# Supplementary material for: W18O49nanowire alignments with a BiOCl shell as an efficient photocatalyst
Source: Royal Society of Chemistry journal article supplement (doi:10.1039/c4nr00905c), 2014-05-08
Supplement: c4nr00905c1.pdf [file c4nr00905c1.pdf]

## **W<sub>18</sub>O<sub>49</sub> Nanowire Alignments with BiOCl Shell as Efficient**

### **Photocatalyst**

*Zhen-Feng Huang<sup>†</sup>, Jiajia Song<sup>†</sup>, Lun Pan<sup>†</sup>, Xu Jia<sup>†</sup>, Zhe Li<sup>†</sup>, Ji-Jun Zou\*<sup>†‡</sup>,*

*Xiangwen Zhang<sup>†‡</sup>, and Li Wang<sup>†‡</sup>*

*<sup>†</sup>Key Laboratory for Green Chemical Technology of the Ministry of Education,*

*School of Chemical Engineering and Technology, Tianjin University, Tianjin 300072,*

*China*

*<sup>‡</sup>Collaborative Innovative Center of Chemical Science and Engineering (Tianjin),*

*Tianjin 300072, China.*

E-mail: [jj\\_zou@tju.edu.cn](mailto:jj_zou@tju.edu.cn) (J.-J. Zou)

## Table of contents

|                  | Captions                                                                                                                                                                                        |
|------------------|-------------------------------------------------------------------------------------------------------------------------------------------------------------------------------------------------|
| <b>Table S1</b>  | Synthetic parameters of all the samples. (a, b and c: ratios defined in the starting materials, determined by ICP, and determined by XPS, respectively.)                                        |
| <b>Figure S1</b> | XRD patterns of W@BiOCl synthesized with BiCl <sub>3</sub> content increasing from W@BiOCl-1 to W@BiOCl-4.                                                                                      |
| <b>Figure S2</b> | UV-vis diffuse reflectance spectra of W@BiOCl with synthesized with BiCl <sub>3</sub> content increasing from W@BiOCl-1 to W@BiOCl-4, pure W <sub>18</sub> O <sub>49</sub> and BiOCl.           |
| <b>Figure S3</b> | XRD pattern of WA-3.                                                                                                                                                                            |
| <b>Figure S4</b> | BJH pore distribution of WA-3 and WA@BiOCl-3.                                                                                                                                                   |
| <b>Figure S5</b> | XPS spectra of (a) W 4f, (b) Bi 4f, (c) O 1s, and (d) Cl 2p from WA@BiOCl-3.                                                                                                                    |
| <b>Figure S6</b> | UV-vis diffuse reflectance spectra of WA@BiOCl synthesized with Bi(NO <sub>3</sub> ) <sub>3</sub> content increasing from WA@BiOCl-1 to WA@BiOCl-4.                                             |
| <b>Figure S7</b> | Changes of MO concentration with irradiated time with the presence of WA@BiOCl-3 under simulated sunlight.                                                                                      |
| <b>Figure S8</b> | Photoactivity of W <sub>18</sub> O <sub>49</sub> /BiOCl physical mixtures by mixing the individual semiconductors with composition identical to WA@BiOCl counterparts under simulated sunlight. |
| <b>Figure S9</b> | XRD patterns of WA@BiOCl-3 before and after the 5-cycling of MO degradation under simulated sunlight.                                                                                           |

| Abbreviations | WCl <sub>6</sub><br>[g] | BiCl <sub>3</sub><br>[g] | morphology | BET<br>[m <sup>2</sup> /g] | [Bi:W] <sup>a</sup> |
|---------------|-------------------------|--------------------------|------------|----------------------------|---------------------|
| BiOCl         |                         | 0.236                    | sheet      | 15.1                       |                     |
| W@BiOCl-1     | 0.297                   | 0.016                    | NW         | 51.2                       | 1:15                |
| W@BiOCl-2     | 0.297                   | 0.03                     | NW         | 50.3                       | 1:8                 |
| W@BiOCl-3     | 0.297                   | 0.047                    | NW         | 49.1                       | 1:5                 |
| W@BiOCl-4     | 0.297                   | 0.079                    | NW         | 41.7                       | 1:3                 |

| Abbreviations | WCl <sub>6</sub><br>[g] | NaNO <sub>3</sub><br>[g] | morphology | BET<br>[m <sup>2</sup> /g] |
|---------------|-------------------------|--------------------------|------------|----------------------------|
| WA-1          | 0.297                   | 0.01                     | alignments | 56.7                       |
| WA-2          | 0.297                   | 0.015                    | alignments | 62.1                       |
| WA-3          | 0.297                   | 0.02                     | alignments | 59.4                       |
| WA-4          | 0.297                   | 0.03                     | alignments | 54.2                       |

| Abbreviations                   | WCl <sub>6</sub><br>[g] | Bi(NO <sub>3</sub> ) <sub>3</sub> ·5H <sub>2</sub> O<br>[g] | morphology | BET<br>[m <sup>2</sup> /g] | [Bi:W]                                                                  |
|---------------------------------|-------------------------|-------------------------------------------------------------|------------|----------------------------|-------------------------------------------------------------------------|
| W <sub>18</sub> O <sub>49</sub> | 0.297                   |                                                             | NW         | 60                         |                                                                         |
| WA@BiOCl-1                      | 0.297                   | 0.024                                                       | alignments | 74.5                       | (1:15) <sup>[a]</sup><br>(6.5%) <sup>[b]</sup> ; (8.2%) <sup>[c]</sup>  |
| WA@BiOCl-2                      | 0.297                   | 0.045                                                       | alignments | 51.8                       | (1:8) <sup>[a]</sup><br>(11.1%) <sup>[b]</sup> ; (15.1%) <sup>[c]</sup> |
| WA@BiOCl-3                      | 0.297                   | 0.073                                                       | alignments | 52.9                       | (1:5) <sup>[a]</sup><br>(19.1%) <sup>[b]</sup> ; (31.6%) <sup>[c]</sup> |
| WA@BiOCl-4                      | 0.297                   | 0.121                                                       | alignments | 37.3                       | (1:3) <sup>[a]</sup><br>(33.7%) <sup>[b]</sup> ; (50.1%) <sup>[c]</sup> |

**Table S1.** Synthetic parameters of all the samples. ([a], [b] and [c]: ratios defined in the starting materials, determined by ICP, and determined by XPS, respectively.)

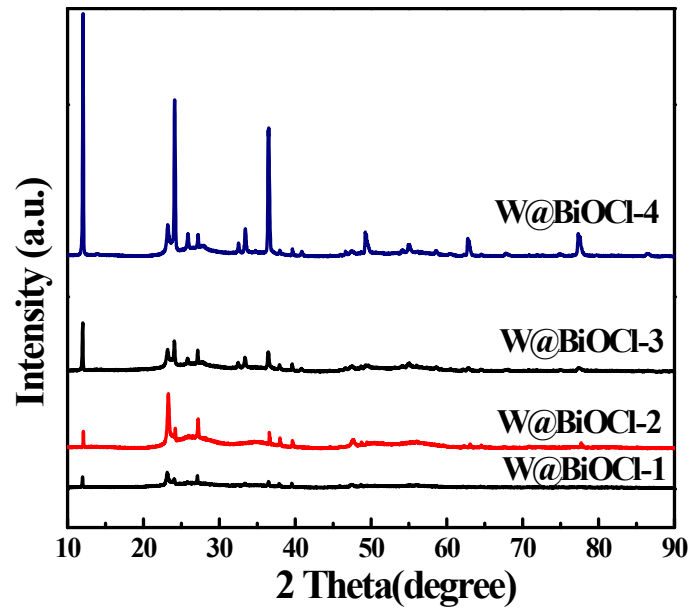

**Figure S1.** XRD patterns of W@BiOCl synthesized with BiCl<sub>3</sub> content increasing from W@BiOCl-1 to W@BiOCl-4.

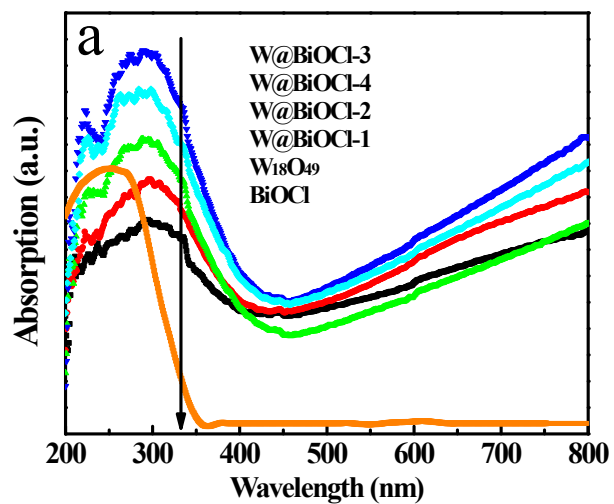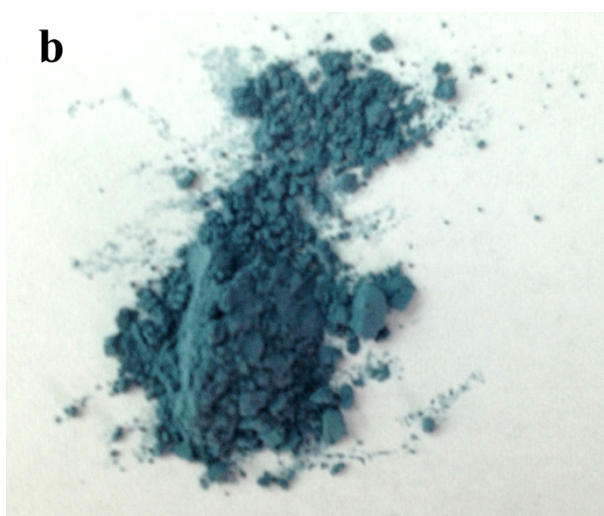

**Figure S2.** (a) UV-vis diffuse reflectance spectra of W@BiOCl with synthesized with BiCl<sub>3</sub> content increasing from W@BiOCl-1 to W@BiOCl-4, pure W<sub>18</sub>O<sub>49</sub> and BiOCl, and (b) Photo image of W@BiOCl-3.

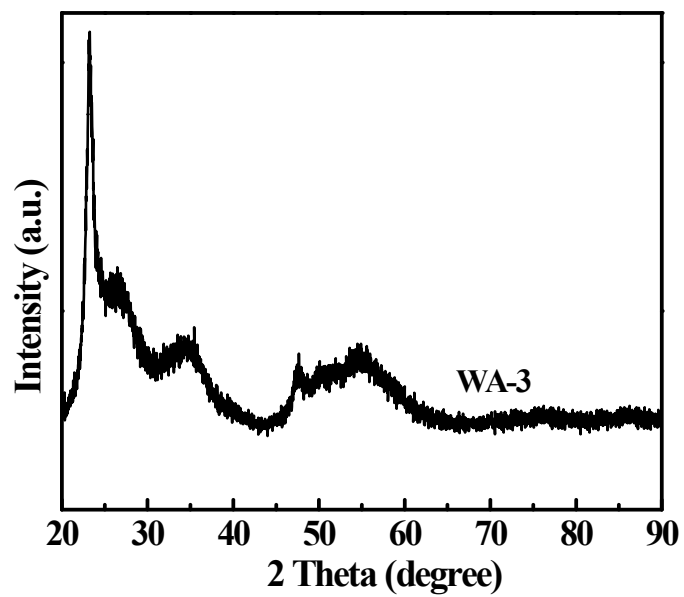

Figure S3. XRD pattern of WA-3.

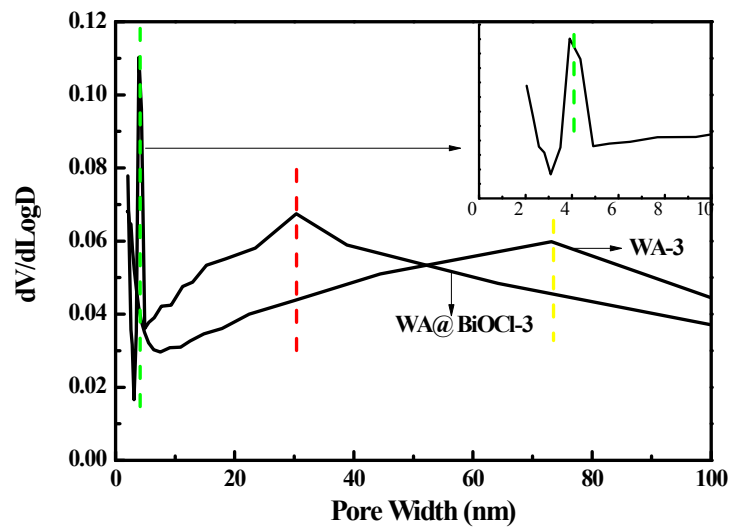

**Figure S4.** BJH pore distribution of WA-3 and WA@BiOCl<sub>3</sub>.

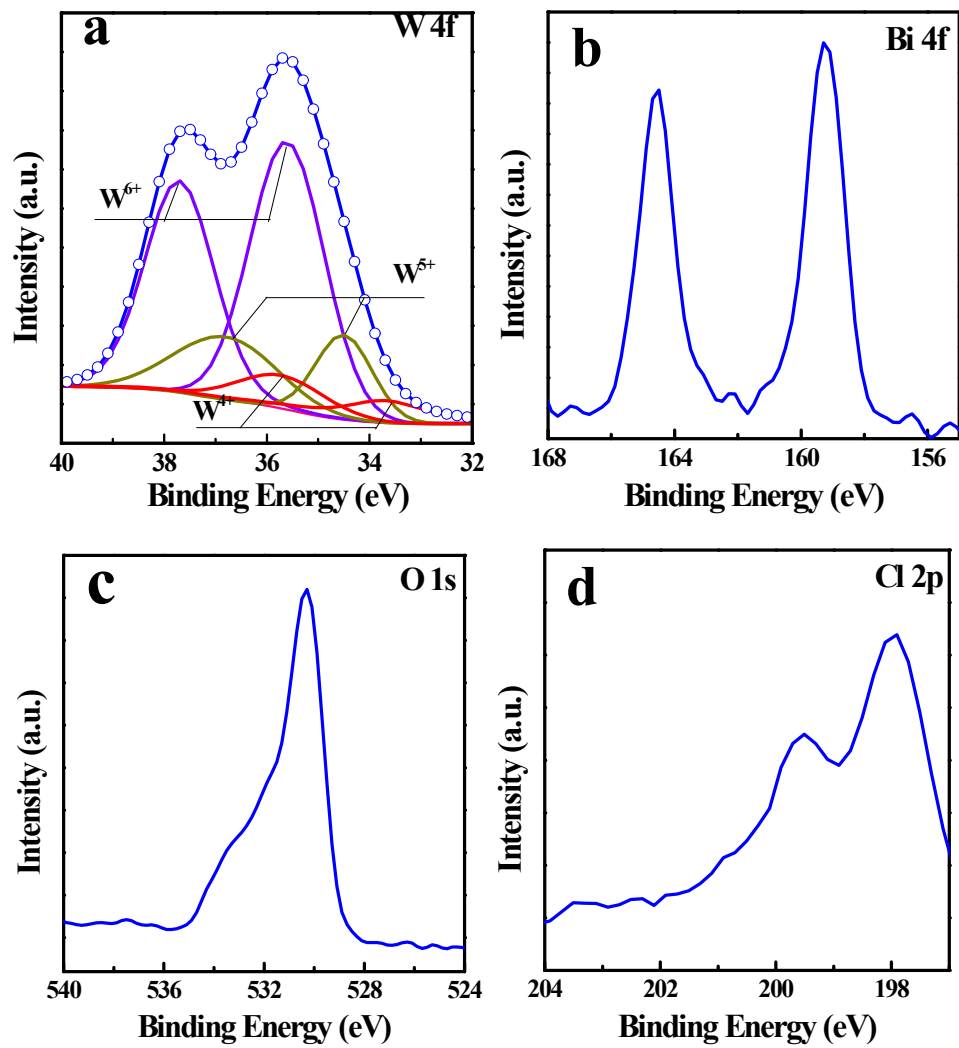

**Figure S5.** XPS spectra of (a) W 4f, (b) Bi 4f, (c) O 1s, and (d) Cl 2p from WA@BiOCl-3.



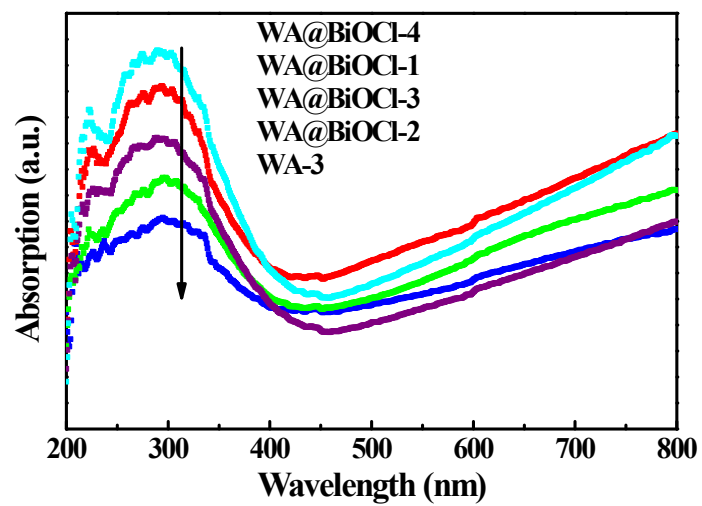

**Figure S6.** UV-vis diffuse reflectance spectra of WA@BiOCl synthesized with  $\text{Bi}(\text{NO}_3)_3$  content increasing from WA@BiOCl-1 to WA@BiOCl-4.

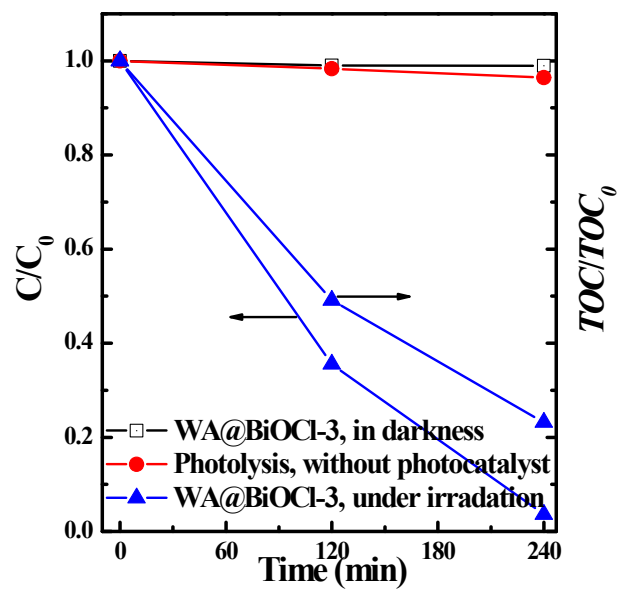

**Figure S7.** Changes of MO concentration with irradiated time with the presence of WA@BiOCl<sub>3</sub> under simulated sunlight.

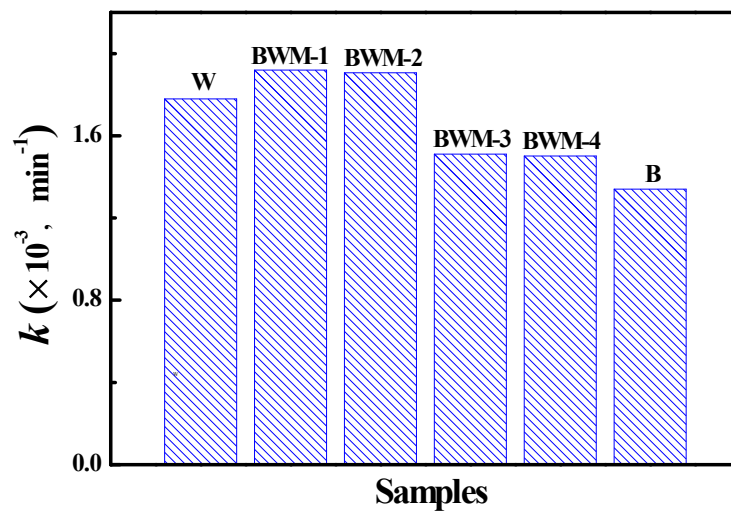

**Figure S8.** Photoactivity of  $\text{W}_{18}\text{O}_{49}/\text{BiOCl}$  physical mixtures (BWM) by mixing the individual semiconductors with composition identical to  $\text{WA@BiOCl}$  counterparts under simulated sunlight.

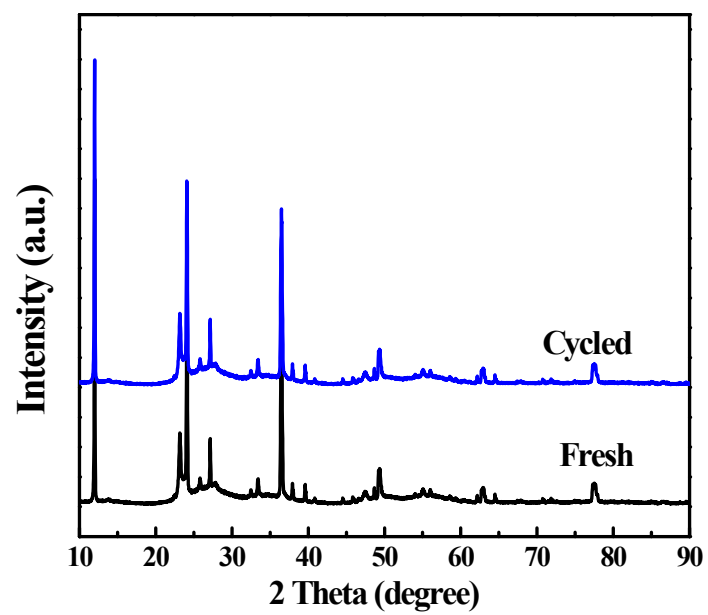

**Figure S9.** XRD patterns of WA@BiOCl<sub>3</sub> before and after the 5-cycling of MO degradation under simulated sunlight.
